# Supplementary material for: A cost-effectiveness analysis of surgical care delivery in Eastern Uganda-a societal perspective
Source: Springer Nature journal article supplement (doi:10.1186/s12913-023-09216-x), 2023-03-15
Supplement: MOESM1 [file 24627580]

Surname

First name

## PATIENT DATA COLLECTION SPREADSHEET

| PATIENT ENROLLMENT QUESTIONS                                 |               |
|--------------------------------------------------------------|---------------|
| <b>DEMOGRAPHIC DATA</b>                                      |               |
| Study subject number                                         | LOS/PX/       |
| Age                                                          |               |
| Sex                                                          |               |
| Marital status                                               |               |
| Address                                                      |               |
| Village                                                      |               |
| District                                                     |               |
| Highest level of education                                   |               |
| Primary occupation                                           |               |
| How many hours a day do you spend on this job                |               |
| Primary source of income                                     |               |
| <b>TRANSPORTATION TO HOSPITAL</b>                            |               |
|                                                              | Cost          |
| Bus                                                          | UGX -         |
| Taxi                                                         | UGX -         |
| Ambulance                                                    | UGX -         |
| Police car                                                   | UGX -         |
| Bicycle                                                      | UGX -         |
| Boda boda (motorcycle)                                       | UGX -         |
| Personal vehicle/ friend                                     | UGX -         |
| Total transportation cost to hospital                        | UGX -         |
| <b>FAMILY AND SOCIAL HISTORY</b>                             |               |
| Position/ role in immediate family                           |               |
| Number of dependants                                         |               |
|                                                              |               |
|                                                              |               |
| <b>CLINICAL DATA</b>                                         |               |
| Date of Admission                                            |               |
|                                                              |               |
| <b>ASSESSMENT SOCIOECONOMIC STATUS</b>                       |               |
| Phone number                                                 |               |
| Phone number                                                 |               |
|                                                              |               |
|                                                              |               |
|                                                              |               |
| <b>EQ 5D disability assessment at arrival (see pdf)</b>      | Range = 1 - 5 |
| Mobility                                                     |               |
| Self-care                                                    |               |
| Usual activities (work, study, housework, family activities) |               |
| Pain/ discomfort                                             |               |
| Anxiety/ depression                                          |               |
| <b>Visual analogue scale</b>                                 | Range 1-100   |
| Self-assessment of health using health scale (0-100)         |               |

| CLINICAL DATA                                                |                              |                                  |
|--------------------------------------------------------------|------------------------------|----------------------------------|
| Date of discharge                                            |                              |                                  |
| <b>REASON FOR DISCHARGE?</b>                                 |                              |                                  |
|                                                              |                              |                                  |
| <b>Condition</b>                                             | <b>Intervention received</b> | <b>Status: Resolved? Yes/No?</b> |
| Diagnosis                                                    |                              |                                  |
| Diagnosis 2 (include name here)                              |                              |                                  |
| Diagnosis 3 (include name here)                              |                              |                                  |
|                                                              |                              |                                  |
| <b>EQ 5D disability assessment at DISCHARGE (see pdf)</b>    | Range = 1 - 5                | <b>Total EQ 5D score</b>         |
| Mobility                                                     |                              | 0                                |
| Self-care                                                    |                              |                                  |
| Usual activities (work, study, housework, family activities) |                              |                                  |
| Pain/ discomfort                                             |                              |                                  |
| Anxiety/ depression                                          |                              |                                  |
| <b>Visual analogue scale</b>                                 |                              |                                  |
| Self-assessment of health using health scale (0-100)         |                              |                                  |
| <b>TRANSPORTATION HOME</b>                                   |                              |                                  |
| Mode of transportation and cost                              |                              | Estimated cost                   |
| Bus                                                          | UGX -                        |                                  |
| Taxi                                                         | UGX -                        |                                  |
| Ambulance                                                    | UGX -                        |                                  |
| Police car                                                   | UGX -                        |                                  |
| Boda boda (motorcycle)                                       | UGX -                        |                                  |
| Personal vehicle/ friend                                     | UGX -                        |                                  |
| Total transportation cost to hospital                        | UGX -                        |                                  |
|                                                              |                              |                                  |
| <b>RESOURCE UTILIZATION</b>                                  |                              |                                  |
| AT SRRH, what do you use electricity for mostly?             |                              |                                  |
| 1. Charging your phone                                       |                              |                                  |
| 2. Charging your torch                                       |                              |                                  |
| 3. Radio                                                     |                              |                                  |
| 4. Other (please specify)                                    |                              |                                  |
| hospital?                                                    |                              |                                  |
| If you cook, where do they get the cooking fuel?             |                              |                                  |

| OPEN-ENDED QUESTIONS AT DISCHARGE                                                                                  |  |
|--------------------------------------------------------------------------------------------------------------------|--|
| How has this hospital admission affected your family or life?                                                      |  |
| How has this hospital admission affected your job?                                                                 |  |
| How has this hospital admission affected your finances?                                                            |  |
| Did you or your family or relatives sell any property or make any hard sacrifices in order for you to access care? |  |
