# Supplementary material for: A cost-effectiveness analysis of surgical care delivery in Eastern Uganda-a societal perspective
Source: BMC Health Serv Res. 2023 Mar 15;23:256. doi: 10.1186/s12913-023-09216-x (PMC10015833; doi:10.1186/s12913-023-09216-x)
Supplement: Supplementary file 2 — Additional file 2. [file 12913_2023_9216_MOESM2_ESM.pdf]

Surname

First name

## ATTENDANT'S DATA COLLECTION SPREADSHEET

| ATTENDANT ENROLLMENT QUESTIONS                                        |                    |
|-----------------------------------------------------------------------|--------------------|
| <b>DEMOGRAPHIC DATA</b>                                               |                    |
| Attendant study number                                                | ATT/LOSPK... / ... |
| Age                                                                   |                    |
| Sex                                                                   |                    |
| Marital status                                                        |                    |
| Address                                                               |                    |
| Village                                                               |                    |
| District                                                              |                    |
| Primary occupation                                                    |                    |
| Primary source of income                                              |                    |
| Highest level of education                                            |                    |
| Mode of transportation and cost                                       | Cost               |
| Bus                                                                   |                    |
| Taxi                                                                  |                    |
| Ambulance                                                             |                    |
| Police car                                                            |                    |
| Boda boda (motorcycle)                                                |                    |
| Personal vehicle/ friend                                              |                    |
| Total transportation cost to hospital                                 | UGX                |
| Where did you travel from?                                            |                    |
| On what date did you arrive SRRH on this your current visit?          |                    |
| How long did it take you to get to the hospital on this visit? (Mins) |                    |
| <b>VISITATION DATA</b>                                                |                    |
| Date of first visit                                                   | 01/01/17           |
| Date of discharge                                                     |                    |
| <b>FAMILY AND SOCIAL HISTORY</b>                                      |                    |
| What is your relationship with the patient?                           |                    |
| What is your position/ role in your immediate family?                 |                    |
| How many people are dependent on you?                                 |                    |
| Other pertinent information (please specify)                          |                    |
| <b>RESOURCE UTILIZATION</b>                                           |                    |
| AT SRRH, what do you use electricity for mostly?                      |                    |
| 1. Charging your phone                                                |                    |
| 2. Charging your torch                                                |                    |
| 3. Radio                                                              |                    |
| 4. Other (please specify)                                             |                    |
| Do you BUY food or do you COOK it in the hospital?                    |                    |
| If you cook, where do they get the cooking fuel?                      |                    |
| Phone number                                                          |                    |

| MODE OF TRANSPORTATION                |          |
|---------------------------------------|----------|
| Last day of visit/ stay               | 01/01/17 |
| Mode of transportation and cost       | Cost     |
| Bus                                   |          |
| Taxi                                  |          |
| Ambulance                             |          |
| Police car                            |          |
| Boda boda (motorcycle)                |          |
| Personal vehicle/ friend              |          |
| Total transportation cost to hospital | UGX      |

| DAILY QUESTIONS                                                                      |                                                            |
|--------------------------------------------------------------------------------------|------------------------------------------------------------|
| <b>OCCUPATION</b>                                                                    |                                                            |
| Are you able to do your primary work? YES/NO                                         |                                                            |
| Other question(s)                                                                    |                                                            |
| <b>RESOURCE UTILIZATION</b>                                                          |                                                            |
| Where did you sleep last night? (YES=1, NO= 0, 98= Not applicable)                   |                                                            |
| At home (not in the hospital)                                                        |                                                            |
| On a bed alone in the ward                                                           |                                                            |
| Shared a bed                                                                         |                                                            |
| On the floor in the ward                                                             |                                                            |
| In a storage room/ other room                                                        |                                                            |
| Outside the ward (in the open)                                                       |                                                            |
| How much water did you use yesterday while at SRRH?                                  |                                                            |
| Buckets                                                                              |                                                            |
| Bottles                                                                              |                                                            |
| Did you use the toilet in the hospital yesterday? (YES=1, NO=0, N/A= Not applicable) |                                                            |
| If No/ Not applicable                                                                |                                                            |
| Why?                                                                                 |                                                            |
| What alternative did you use?                                                        |                                                            |
| <b>VISITATION DATA</b>                                                               |                                                            |
| Arrival                                                                              |                                                            |
| FILL IF ATTENDANT COMES AND GOES                                                     |                                                            |
| FILL IF ATT                                                                          | Mode of transportation and cost                            |
| FILL IF ATT                                                                          | Bus                                                        |
| FILL IF ATT                                                                          | Taxi                                                       |
| FILL IF ATT                                                                          | Ambulance                                                  |
| FILL IF ATT                                                                          | Police car                                                 |
| FILL IF ATT                                                                          | Boda boda (motorcycle)                                     |
| FILL IF ATT                                                                          | Walking                                                    |
| FILL IF ATT                                                                          | Personal vehicle/ friend                                   |
| FILL IF ATT                                                                          | How much did it cost you to transport yourself to SRRH     |
| FILL IF ATTENDANT COMES AND GOES                                                     |                                                            |
| FILL IF ATT                                                                          | Departure                                                  |
| FILL IF ATT                                                                          | Where are you going to                                     |
| FILL IF ATT                                                                          | Mode of transportation and cost                            |
| FILL IF ATT                                                                          | Bus                                                        |
| FILL IF ATT                                                                          | Taxi                                                       |
| FILL IF ATT                                                                          | Ambulance                                                  |
| FILL IF ATT                                                                          | Police car                                                 |
| FILL IF ATT                                                                          | Boda boda (motorcycle)                                     |
| FILL IF ATT                                                                          | Walking                                                    |
| FILL IF ATT                                                                          | Personal vehicle/ friend                                   |
| FILL IF ATT                                                                          | Cost of transportation to SRRH                             |
| FILL IF ATT                                                                          | How much will/ did it cost you to transport yourself home? |

|                                                                                                                    |  |
|--------------------------------------------------------------------------------------------------------------------|--|
| How has this hospital admission affected your family or life?                                                      |  |
| How has this hospital admission affected your job?                                                                 |  |
| How has this hospital admission affected your finances?                                                            |  |
| Did you or your family or relatives sell any property or make any hard sacrifices in order for you to access care? |  |
